# Supplementary material for: Prediction of the Network Pharmacology‐Based Mechanism for Attenuation of Atherosclerosis in Apolipoprotein E Knockout Mice by Panax notoginseng Saponins
Source: Hindawi journal article supplement (doi:10.1155/2020/8574702), 2020-01-01
Supplement: f1 [file 8574702.f1.pdf]

## Chromatogram

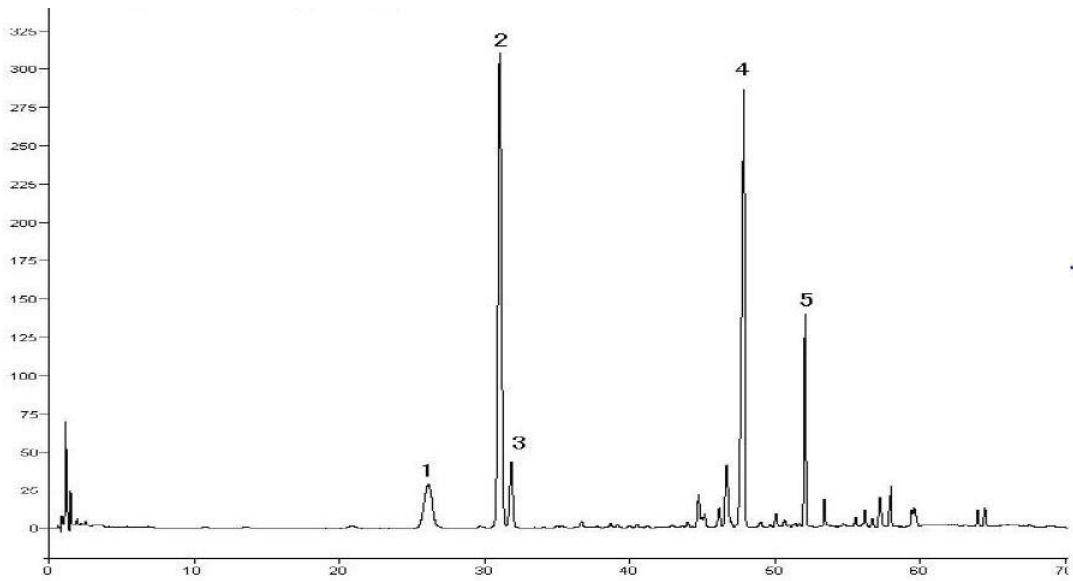

1: *Notoginsenoside R1*    2: *ginsenoside Rg1*    3: *ginsenoside Re*

4: *ginsenoside Rb1*    5: *ginsenoside Rd*

## Certificate of Analysis

| 检验项目<br>Test items                 | 标准规定<br>Specifications                                                                                                                        | 检验结果<br>Results   | 单项判定<br>Individual<br>Conclusion |
|------------------------------------|-----------------------------------------------------------------------------------------------------------------------------------------------|-------------------|----------------------------------|
| 重量差异<br>Variation                  | ±10%                                                                                                                                          | ±10%              | 合格<br>Compliant                  |
| 崩解时限<br>Disintegration             | 应≤60分钟<br>Not more than 60 minutes                                                                                                            | 6分钟<br>6 minutes  | 合格<br>Compliant                  |
| 微生物限度<br>Microbial limit           | 需氧菌总数 Bacteria: ≤10 <sup>3</sup> cfu/g                                                                                                        | <10 cfu/g         | 合格<br>Compliant                  |
|                                    | 霉菌和酵母菌总数 Molds and yeasts:<br>≤10 <sup>2</sup> cfu/g                                                                                          | <10 cfu/g         | 合格<br>Compliant                  |
|                                    | 大肠埃希菌 Escherichia Coli: 1g中不得检出 none in 1g                                                                                                    | 符合规定<br>Compliant | 合格<br>Compliant                  |
| 指纹图谱<br>Fingerprint                | 供试品与对照品指纹图谱经相似度计算,<br>其相似度不得低于 0.95<br>The similarity between the tested product and<br>the reference product should not be<br>less than 0.95 | 1.000             | 合格<br>Compliant                  |
| 【含量】Assay<br>(标示量计 Labeled amount) | 三七皂苷 Notoginsenoside R <sub>1</sub> : ≥5.0%                                                                                                   | 9.8%              | 合格<br>Compliant                  |
|                                    | 人参皂苷 Ginsenoside Rg <sub>1</sub> : ≥25.0%                                                                                                     | 30.8%             | 合格<br>Compliant                  |
|                                    | 人参皂苷 Ginsenoside Re: ≥2.5%                                                                                                                    | 4.3%              | 合格<br>Compliant                  |
|                                    | 人参皂苷 Ginsenoside Rb <sub>1</sub> : ≥27.0%                                                                                                     | 32.1%             | 合格<br>Compliant                  |
|                                    | 人参皂苷 Ginsenoside Rd: ≥5.0%                                                                                                                    | 8.3%              | 合格<br>Compliant                  |
|                                    | R <sub>1</sub> +Rg <sub>1</sub> + Re + Rb <sub>1</sub> + Rd: ≥75%                                                                             | 85%               | 合格<br>Compliant                  |
